# Supplementary material for: Development and validation of a high-throughput transcriptomic biomarker to address 21st century genetic toxicology needs
Source: PubMed Central journal article supplement — Proc Natl Acad Sci U S A. 2017 Dec 4;114(51):E10881–9. doi: 10.1073/pnas.1714109114 (PMC5754797; doi:10.1073/pnas.1714109114), 2017-12-04
Supplement: pnas.201714109SI.pdf [file pnas.201714109SI.pdf]

# Supporting Information

Li et al. 10.1073/pnas.1714109114

## SI Materials and Methods

**Cell Culture and Treatment.** TK6 cells were grown in RPMI 1640 medium supplemented with 10% FBS as described previously (8). The cell culture density was maintained at a concentration of  $1\text{--}10 \times 10^5$  cells/mL. On the day before treatment, 5 mL of cells at a concentration of  $2 \times 10^5$  cells/mL were seeded in six-well plates. All chemicals were purchased from Sigma-Aldrich. Stocks of chemicals were prepared according to the manufacturer's instructions. Stock solutions were added to the culture medium, followed by incubation at 37 °C in 5% CO<sub>2</sub> for 4 h. Simultaneously, the control for each treatment was treated with the vehicle, H<sub>2</sub>O, PBS, or DMSO. Each treatment was performed in triplicate. At the end of the 4-h treatment period, cells were pelleted and subjected to RNA isolation. Dose-response studies were performed using six concentrations with fivefold dilution for all testing chemicals to determine the concentration for the microarray experiments. For IR exposure, cells were irradiated at a dose of 4 Gy using a gamma ray (<sup>137</sup>Cs) irradiator.

To assess chemicals requiring metabolic activation, cells were treated with the chemicals in the presence of 1% 5,6 benzoflavone/phenobarbital-induced rat liver S9 with NADPH generating system cofactors (Moltox) at two concentrations for 8 h. The concentration and treatment time were based on the earlier study (11).

**Cell Viability Assay.** The cytotoxicity of each compound was measured using the MTT assay. TK6 cells were treated with a range of doses from 3 nM to 100 μM using 10 different concentrations with threefold dilution for 4 h in triplicate. At the end of the 4-h treatment, the medium was removed and cells were washed twice with PBS. Fresh medium was added to the cells, and cells recovered at 37 °C in 5% CO<sub>2</sub> for 20 h. Cell viability was measured at the end of recovery period using the

MTT Assay Kit (Cayman Chemical) following the manufacturer's instructions. If the IC<sub>50</sub> was not clearly observed, then a second concentration range (up to 5 mM) was used.

**RNA Isolation and qRT-PCR.** RNA was extracted using the TRIzol protocol (Invitrogen) according to the manufacturer's instructions and then purified using the RNeasy Mini Kit (Qiagen). Purified RNA was subjected to spectrometry and Bioanalyzer analysis (Agilent) to determine the quantity and quality, respectively. qRT-PCR was performed with an iCycler (Bio-Rad) to measure the expression of *ATF3*, *CDKN1A*, and *GADD45A*. Brilliant III Ultra-Fast QRT-PCR Master Mix (Agilent) was used, and primer/probe sets for the TaqMan gene expression assays were purchased from Applied Biosystems. Each assay was done in triplicate. Expression levels of genes were normalized with *GAPDH*. The relative mRNA induction fold change was calculated (8). When more than one concentration met the criteria and behaved similarly, the lower concentration was selected.

**Microarray Procedures.** RNAs from the dose setting experiment of each compound at their selected concentrations were pooled together, and 5 μg of pooled RNA from treated and vehicle control was labeled with the Fairplay III Microarray Labeling Kit (Agilent). The resultant cDNA was labeled with either Cy3 or Cy5. The labeled cDNAs were then purified, and cDNA yield and dye incorporation were measured with a NanoDrop ND-1000 spectrophotometer. Hybridization to the Agilent SurePrint G3 human whole genome 8 × 60k microarray kit was conducted following the manufacturer's protocol, and dye swaps were performed. Arrays were scanned with an Agilent DNA microarray scanner. Feature Extraction version 10.7 (Agilent) was used to filter, normalize, and calculate the signal intensity and ratios. Processed data were subjected to analysis using GeneSpring version 12.0 (Agilent).







A

Microarray

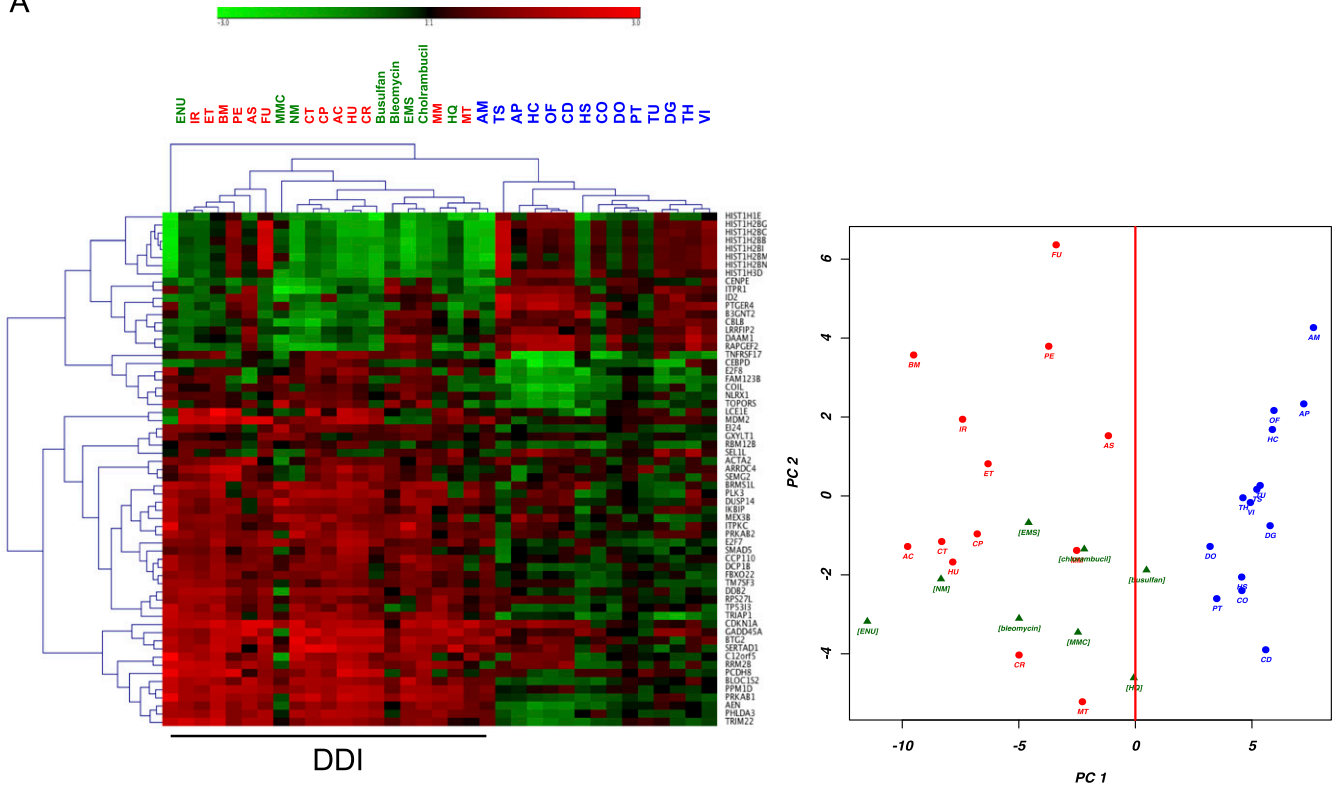

nCounter

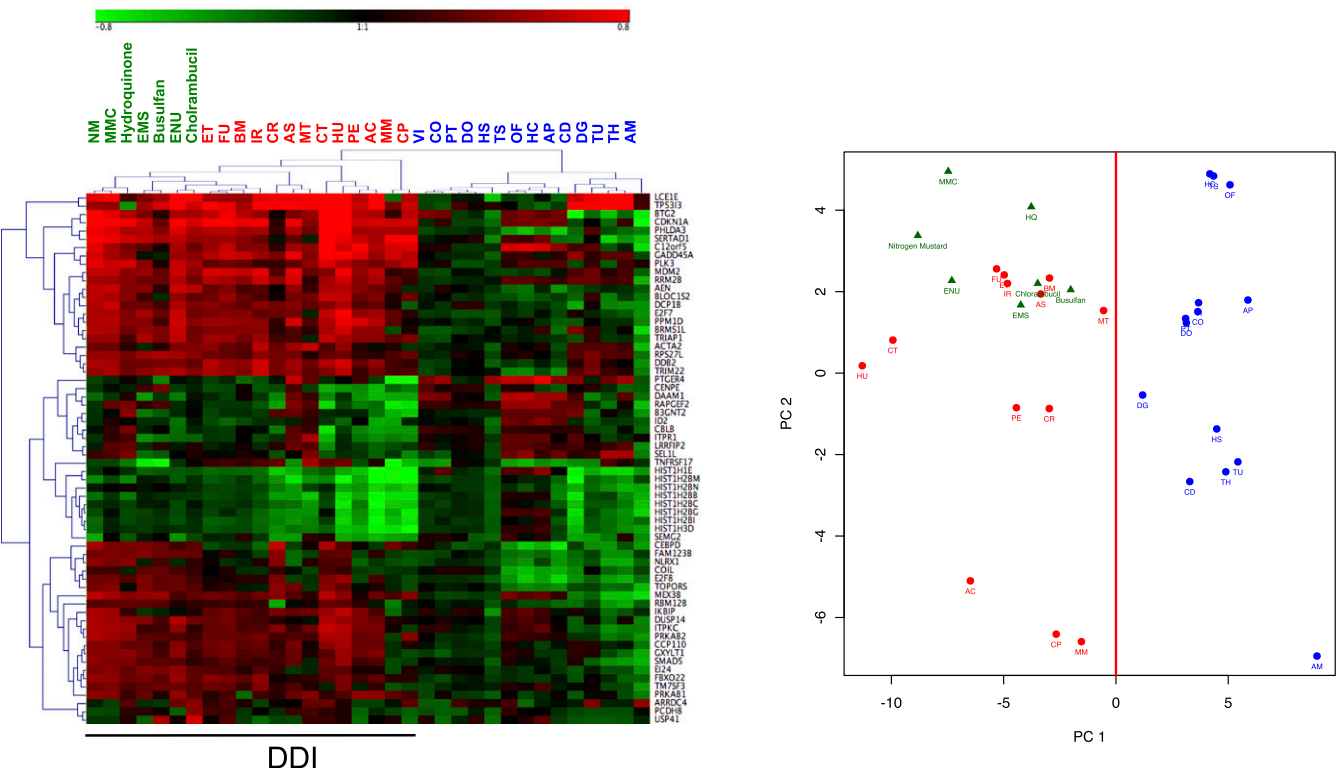

Fig. S4. (Continued)



B

Microarray

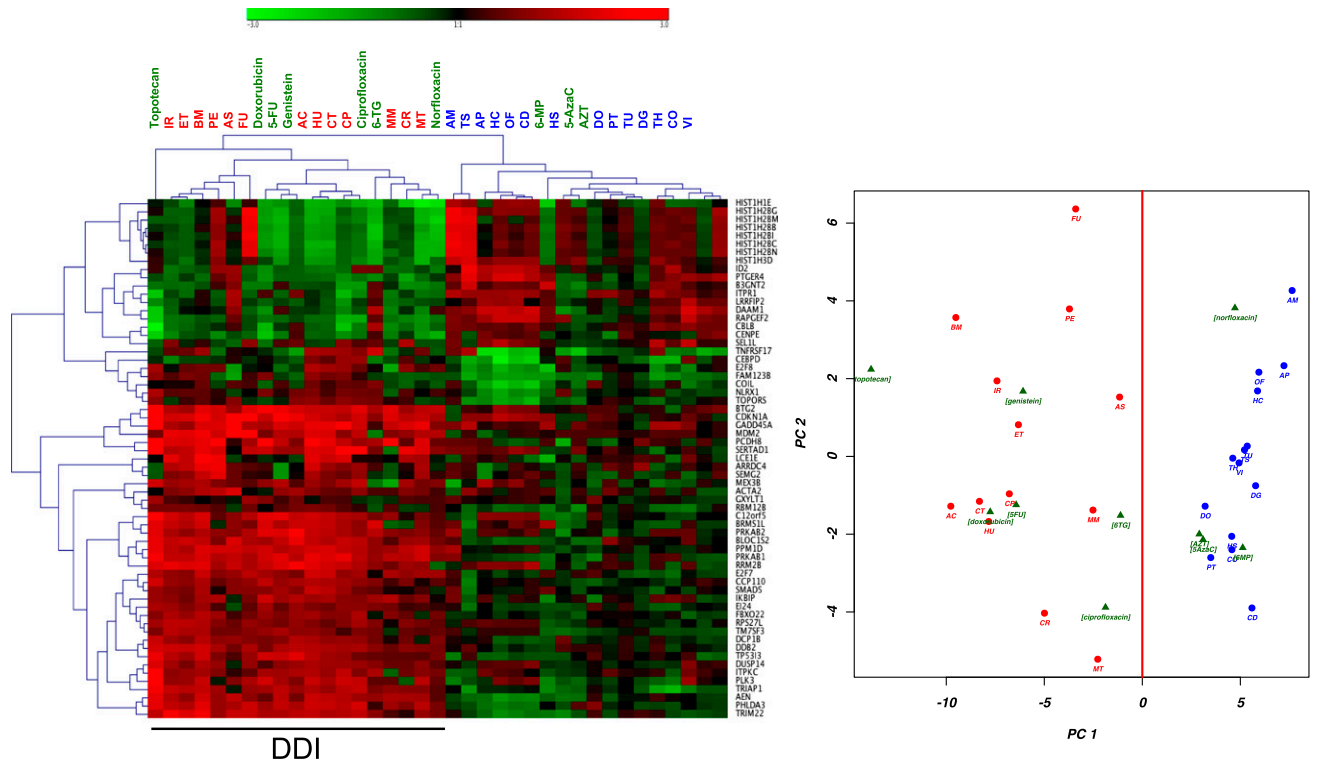

nCounter

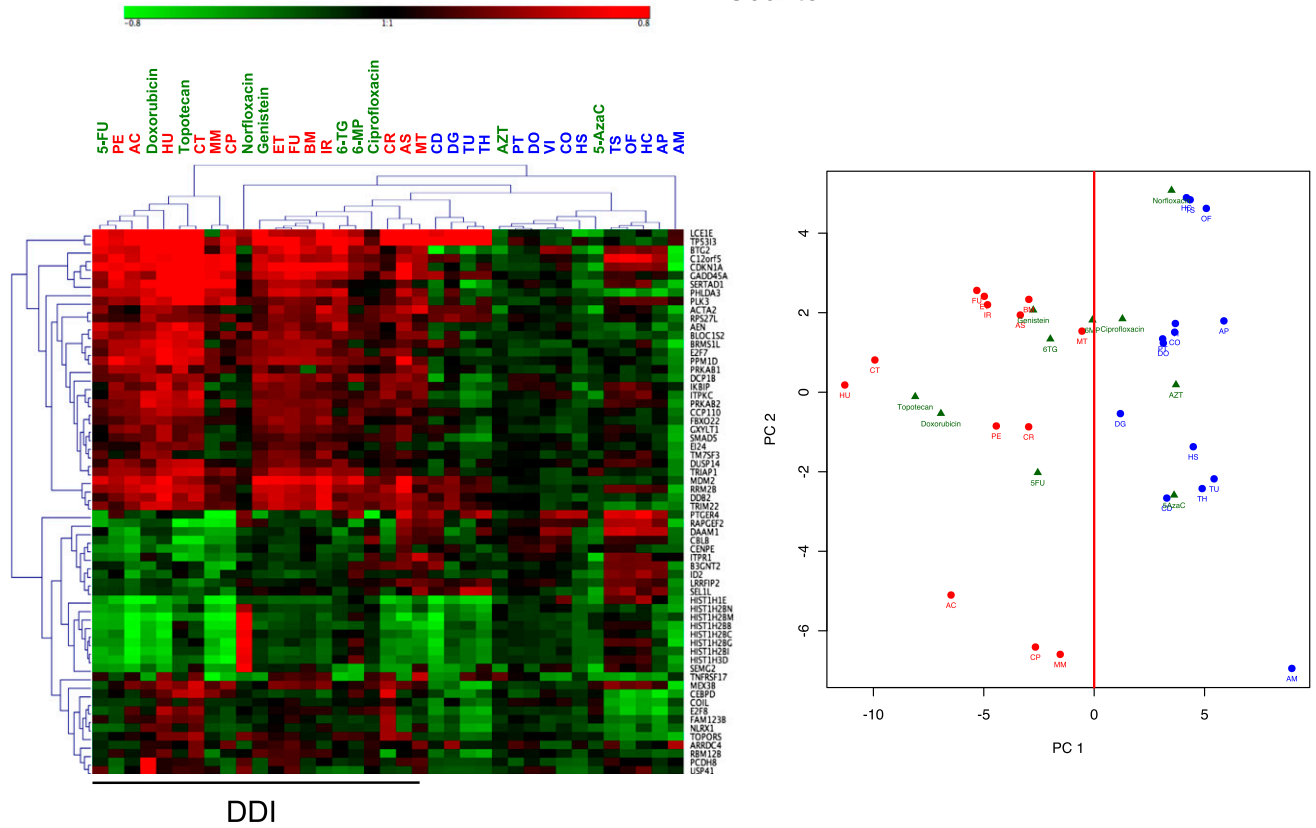

Fig. S4. (Continued)

C

Microarray

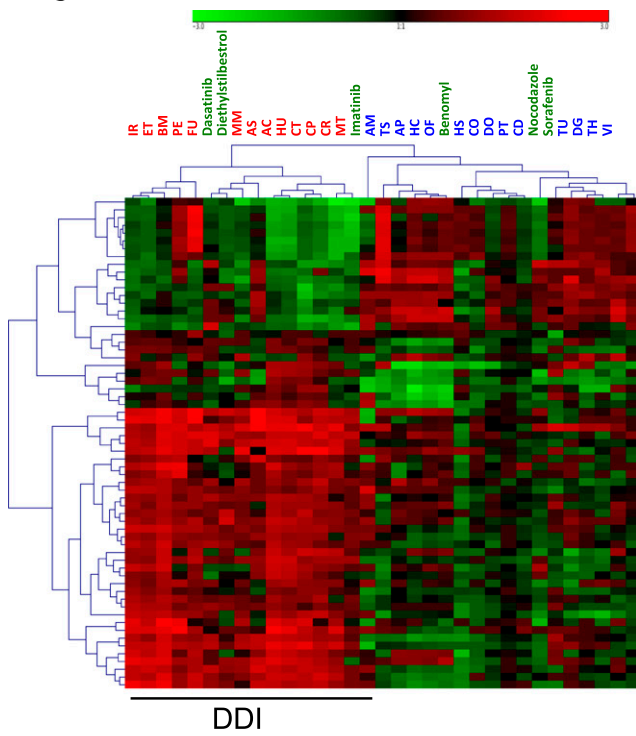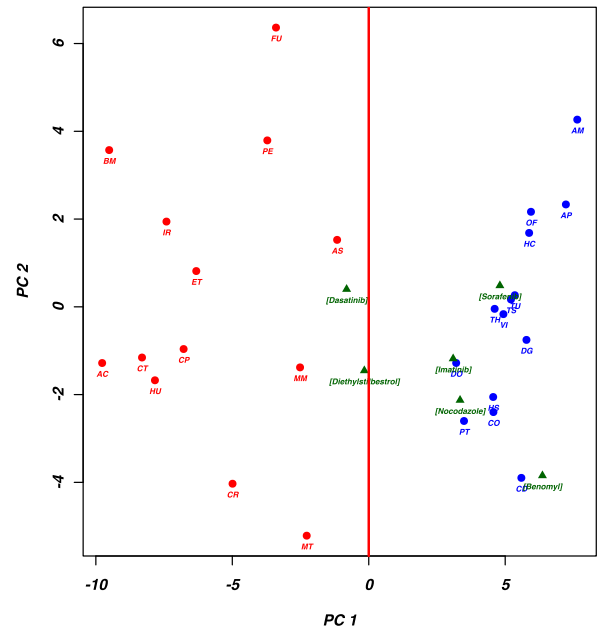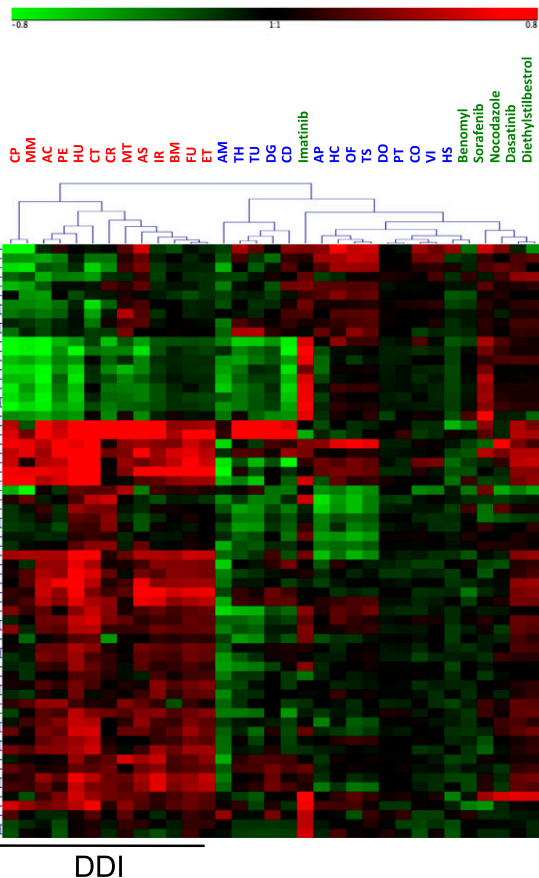

nCounter

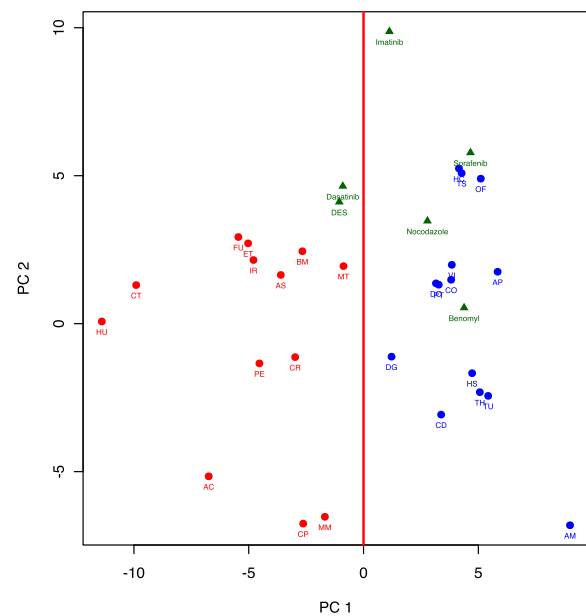

Fig. S4. (Continued)

D

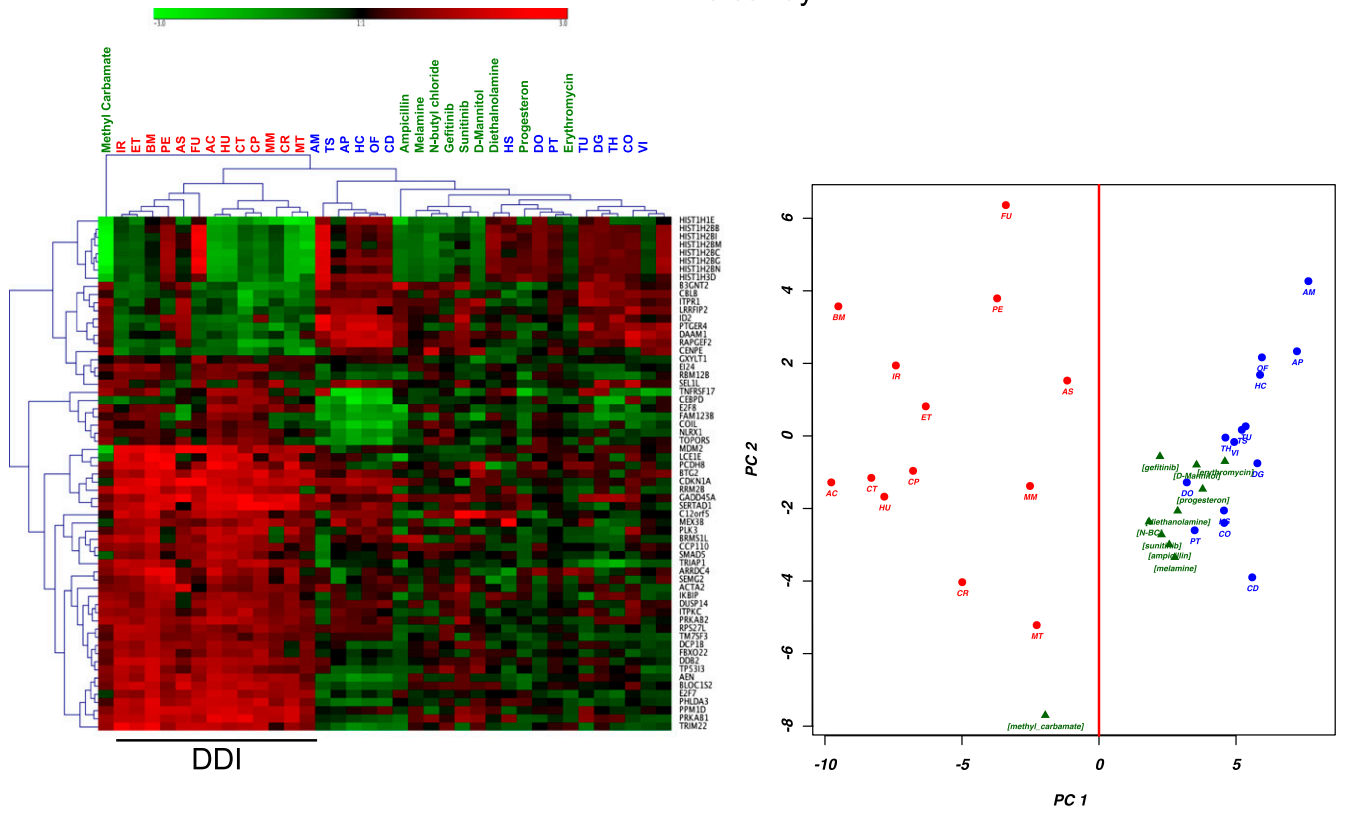

nCounter

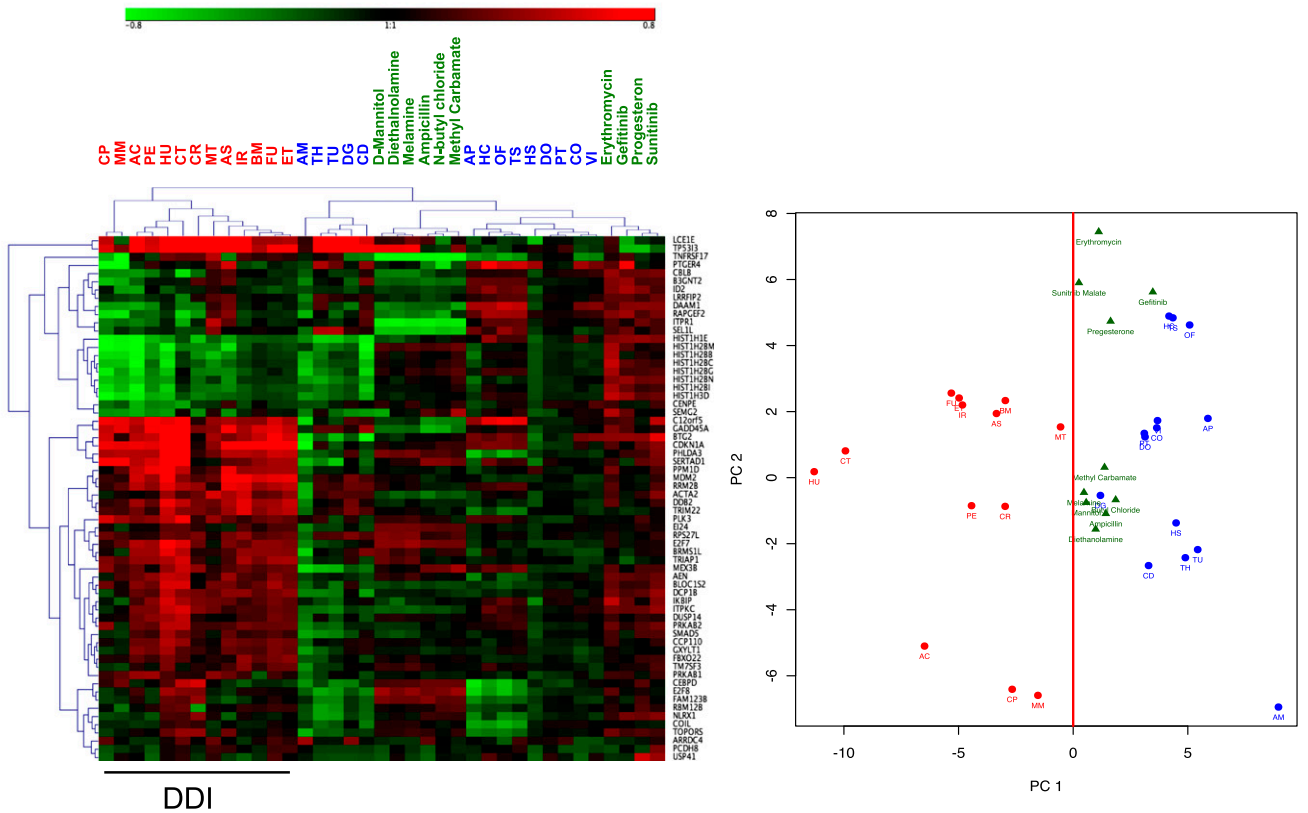

Fig. S4. (Continued)



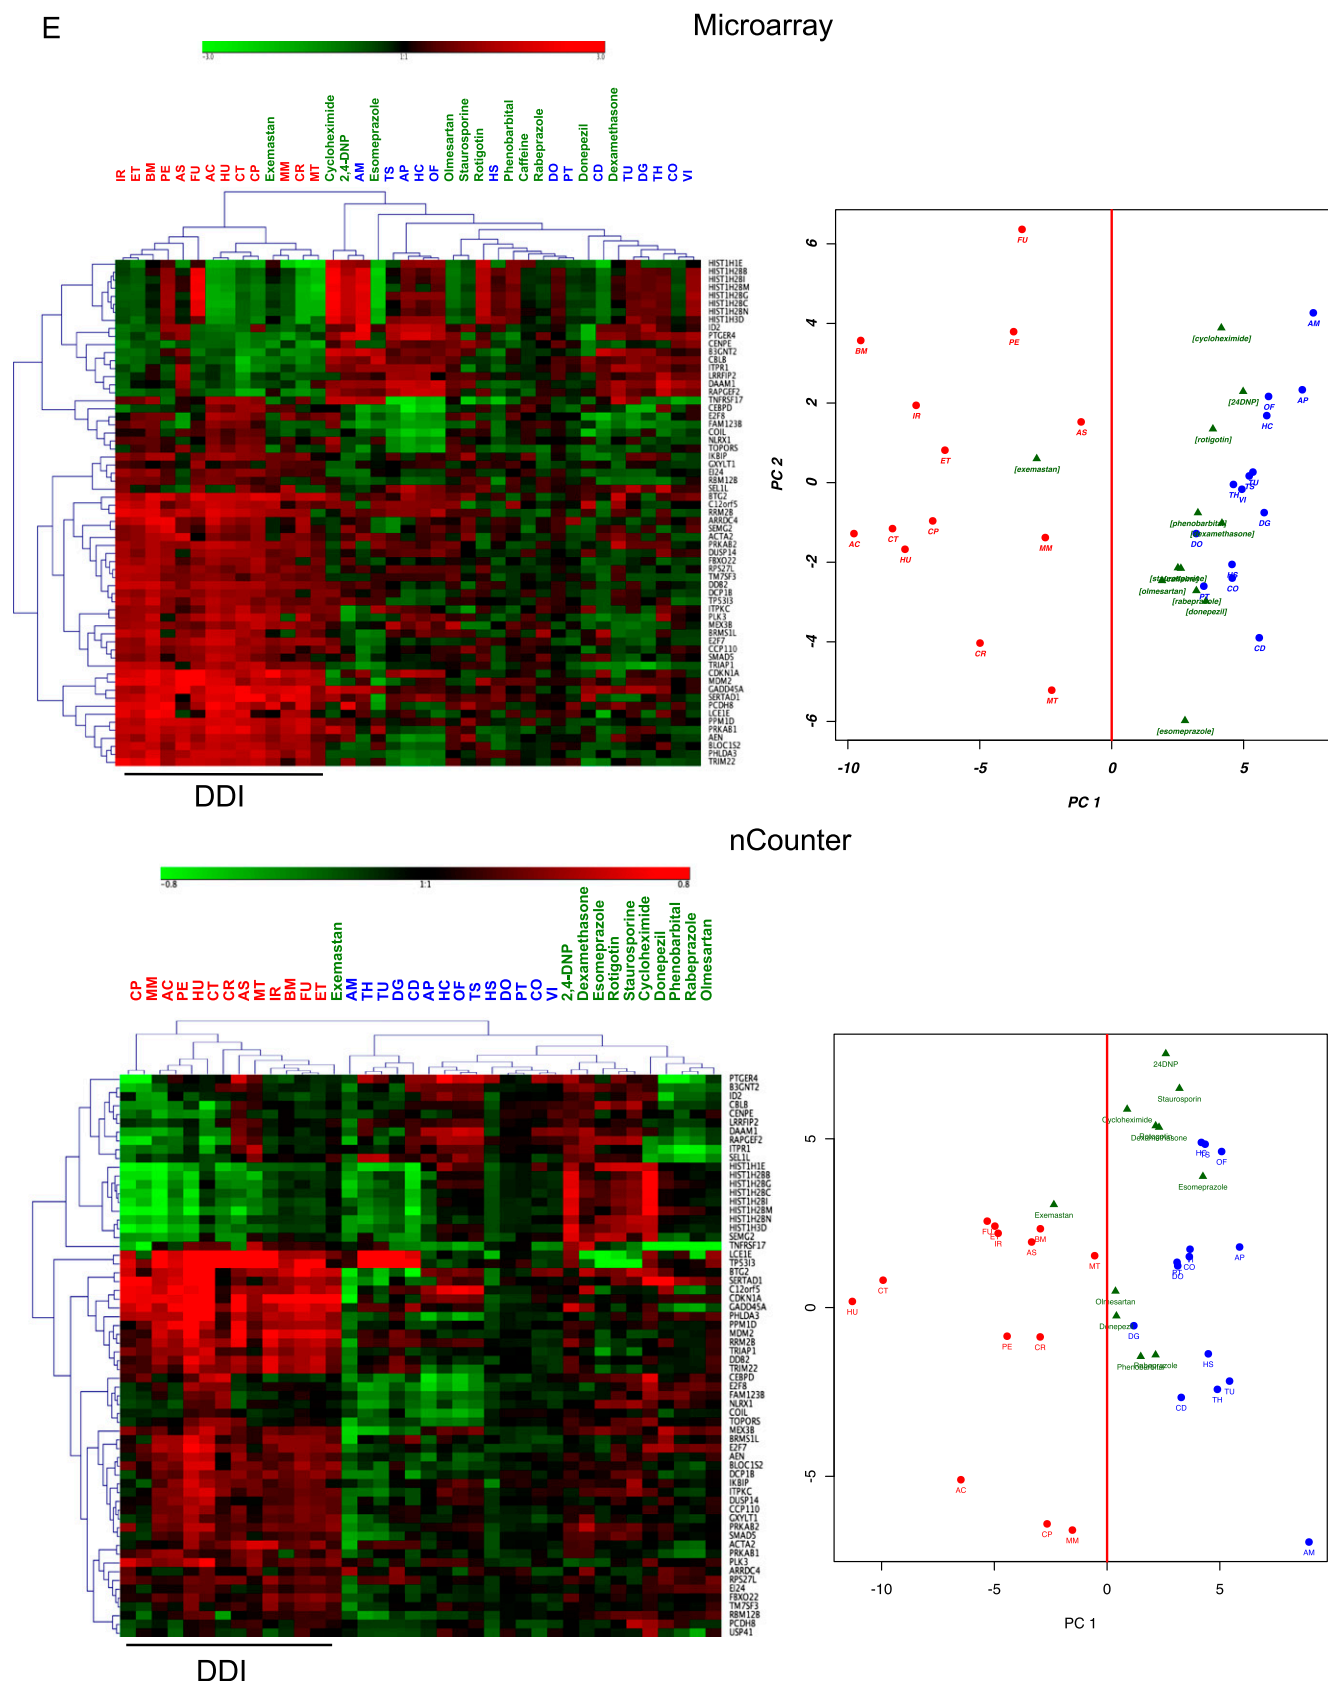

**Fig. S4.** Results of two DDI prediction methods using TGx-DDI, 2DC and PCA, for microarray data and nCounter data of the validation chemicals from five general classes. These two methods are described detail in *Materials and Methods*. (Left) 2DC results. (Right) PCA results. (Top) Microarray data. (Bottom) nCounter data. In both plots, the compounds in the learning set were labeled in two-letter short form, with red indicating DDI and blue indicating non-DDI.

Legend continued on following page







**Table S1. Representative recent references addressing issues with current in vitro genotoxic assays**

| Issue discussed                                                                        | Summary of selected references                                                                                                                                                                                                                                                                                                                                                                                                                                                                                                                                                                                                                                                                                                                                                                       |
|----------------------------------------------------------------------------------------|------------------------------------------------------------------------------------------------------------------------------------------------------------------------------------------------------------------------------------------------------------------------------------------------------------------------------------------------------------------------------------------------------------------------------------------------------------------------------------------------------------------------------------------------------------------------------------------------------------------------------------------------------------------------------------------------------------------------------------------------------------------------------------------------------|
| Assessment of specificity issue of in vitro genotoxic assays                           | A battery of three of the most commonly used in vitro genotoxicity tests has been evaluated for its ability to discriminate rodent carcinogens and noncarcinogens, from a large database of more than 700 chemicals. Very low specificity. When all three tests were performed, 75–95% of noncarcinogens gave positive (i.e., false positive) results in at least one test in the battery (5). Results of the MLA and the chromosomal aberration test obtained for rodent carcinogens and noncarcinogens were analyzed in more detail. Correlation between tumor profile and pattern of genotoxicity results was investigated (27).                                                                                                                                                                  |
| Discussion of causative factors in false-positive results                              | Genotoxicity tests in mammalian cells in vitro produce a remarkably high and unacceptable occurrence of irrelevant positive results (e.g., compared with rodent carcinogenicity). Cell lines commonly used for genotoxicity testing have various deficiencies that may contribute to the high false- positive rate (28). High concentrations of test compounds and high levels of cytotoxicity are potential sources of false-positive results (28).<br>“Promiscuous activation,” the decisive in vivo enzyme, is missing in vitro (28). Underestimation of cytotoxicity may lead to selection of inappropriately toxic concentrations for analysis, with the potential for generation of irrelevant positive results (29).                                                                          |
| Guideline for follow-up actions from positive results and considerations of new assays | A flowchart provides guidance on the decision process for follow-up actions in case of clear positive results in vitro (30).<br><br>Consideration of a hypothesized mode of action is a powerful approach to direct possible follow-up testing for positive results in vitro (30). Lists of three groups of chemicals are recommended for assessment of the performance of new genotoxicity tests. One group is for irrelevant positive results in vitro (31). Cell systems, preferably of human origin, that are p53 and DNA-repair proficient, have defined phase 1 and phase 2 metabolism covering a broad set of enzyme forms, and are used within the context of appropriately set limits of concentration and cytotoxicity offer the best hope for reduced false-positives in the future (28). |

While the rate of false (or irrelevant) positives often varies with the particular study, it remains substantial.

**Table S2. Correlation coefficient for cisplatin treatments**

| Sample ID   | Cisplatin 1 | Cisplatin 2 | Cisplatin 3 | Cisplatin 4 |
|-------------|-------------|-------------|-------------|-------------|
| Cisplatin 1 | –           | 0.97        | 0.95        | 0.96        |
| Cisplatin 2 | 0.97        | –           | 0.95        | 0.95        |
| Cisplatin 3 | 0.95        | 0.95        | –           | 0.96        |
| Cisplatin 4 | 0.96        | 0.95        | 0.96        | –           |

Correlation coefficient is calculated across the four replicate treatments with 80 μM cisplatin on 432 significantly perturbed genes relative to solvent controls ( $P < 0.01$ , Bonferroni correction).
